# Supplementary material
Source: publisher site journal article supplement (https://www.dovepress.com/get_supplementary_file.php?f=498065.docx)
Supplement: Supplementary file 1 [file get_supplementary_file.php]

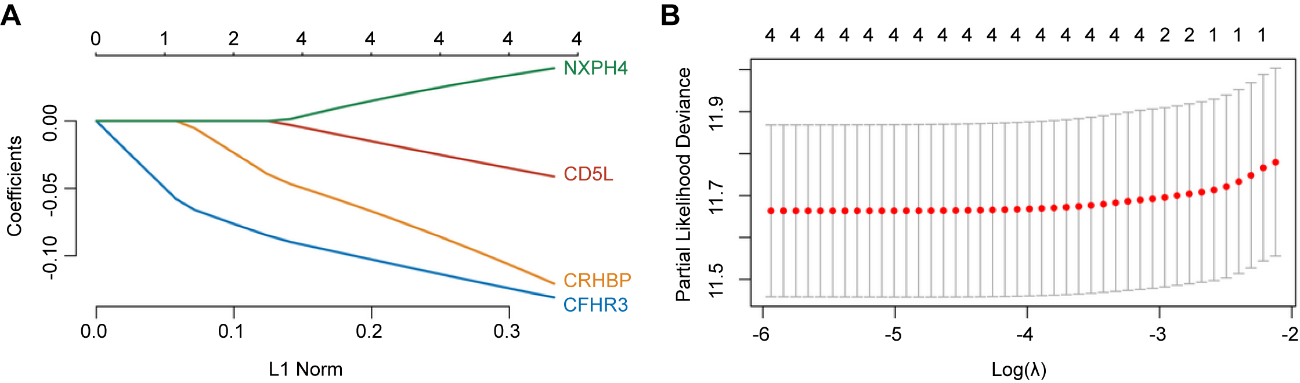
**Figure S1 | A** The variation characteristics of the coefficient of variables. **B** The selection process of the optimum value of the parameter λ in the Lasso regression model by cross-validation method.


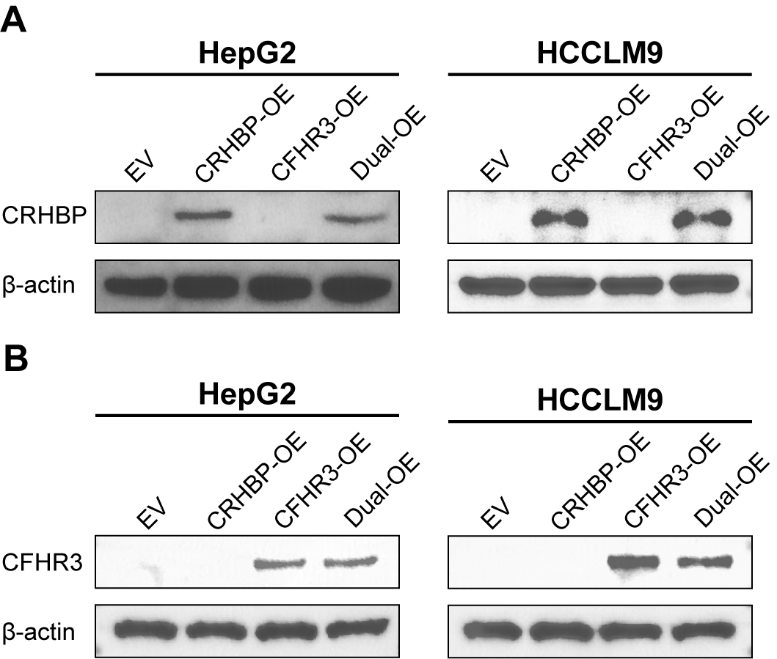


**Figure S2 | A** Western blot to verify the overexpression efficiency of CRHBP. **B** Western blot to verify the overexpression efficiency of CFHR3.


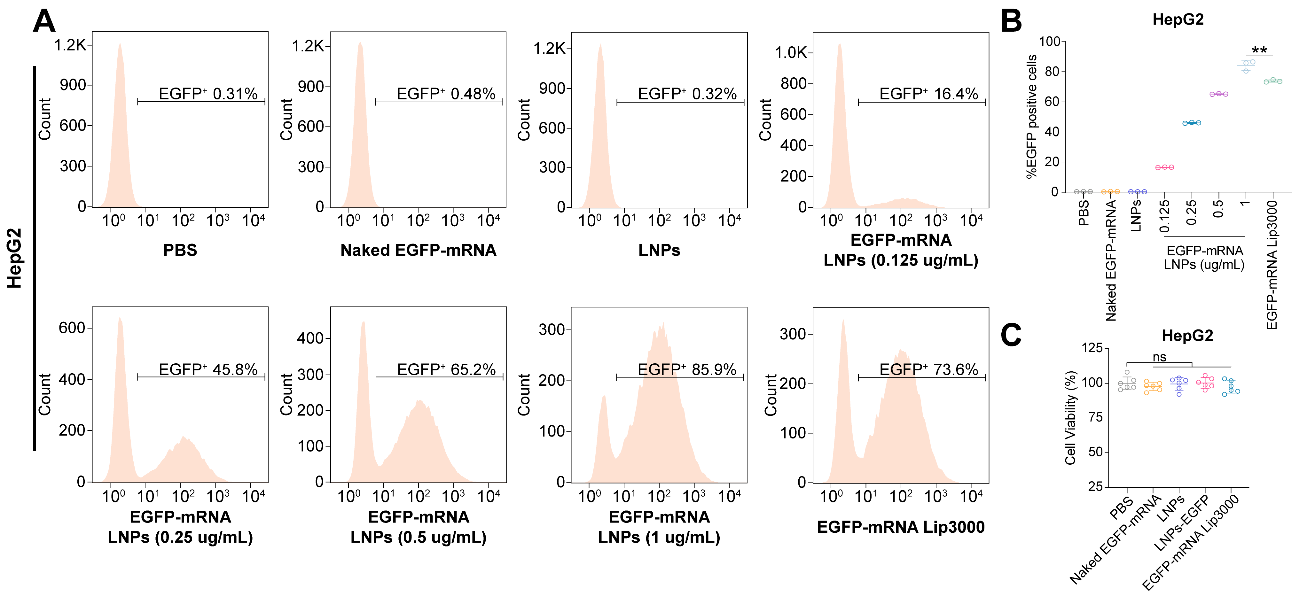


**Figure S3 | A-B** Representative images (**A**) and quantitative results (**B**) of the in vitro transfection efficiency (percentage of EGFP-positive cells) in the HepG2 cells were determined by flow cytometry. **C** Cell viability of the HepG2 cells after treatment with PBS, naked EGFP-mRNA (1 μg/ml), LNPs, LNPs-EGFP (1 μg/ml), or EGFP-mRNA Lip3000 (1 μg/ml). ** *P* < 0.001; ns, no statistical difference.

**
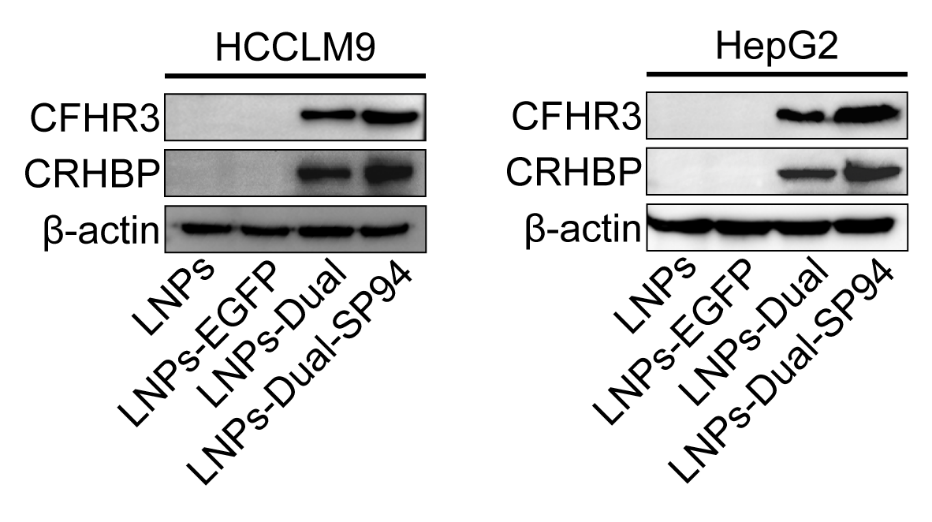
**

**Figure S4 |** Western blot to verify CRHBP or CFHR3 protein expression in HCC cells treated with LNPs-Dual-SP94 or controls. The mRNA concentration was 1 μg/ml.


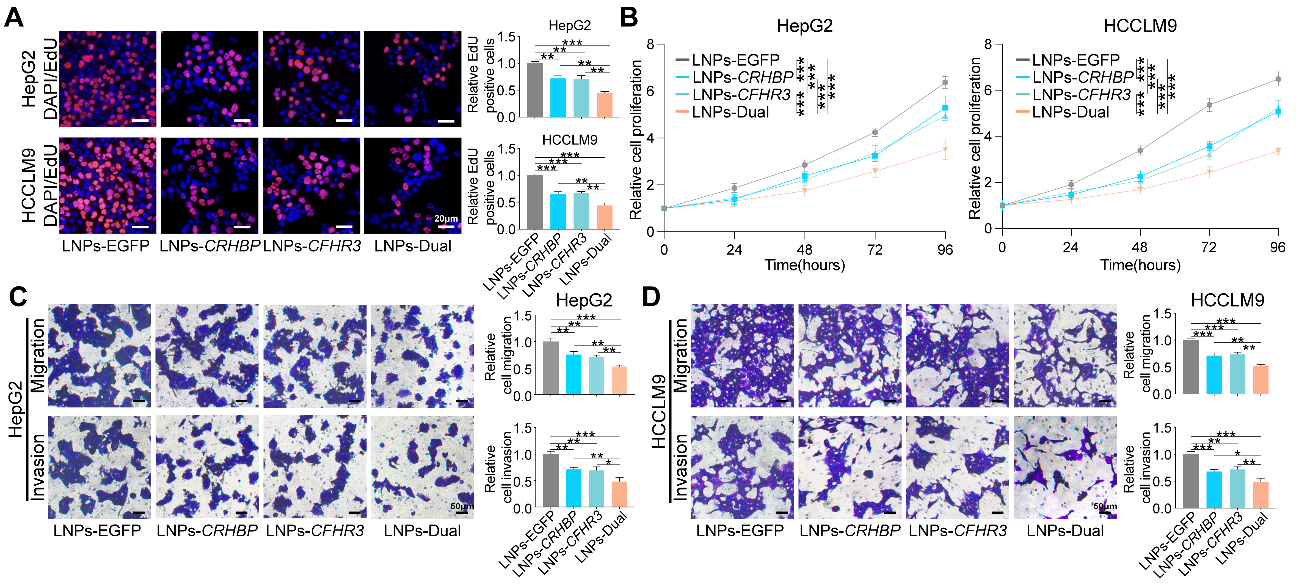


**Figure S5** **| A** Representative images (left) and quantitative results (right) of EdU assay in HepG2 and HCCLM9 cells treated with LNPs-EGFP, LNPs-*CRHBP*, LNPs-*CFHR3* or LNPs-Dual. Scale bar, 20μm. **B** CCK-8 assay in HepG2 and HCCLM9 cells as indicated treatment. **C-D** Representative images (left) and quantitative results (right) of transwell migration and invasion assays in HepG2 (**C**) and HCCLM9 (**D**) cells treated with LNPs-EGFP, LNPs-*CRHBP*, LNPs-*CFHR3* or LNPs-Dual. Scale bar, 50μm. The mRNA concentration was 1 μg/ml. * *P* < 0.05; ** *P* < 0. 01; *** *P* < 0.001.


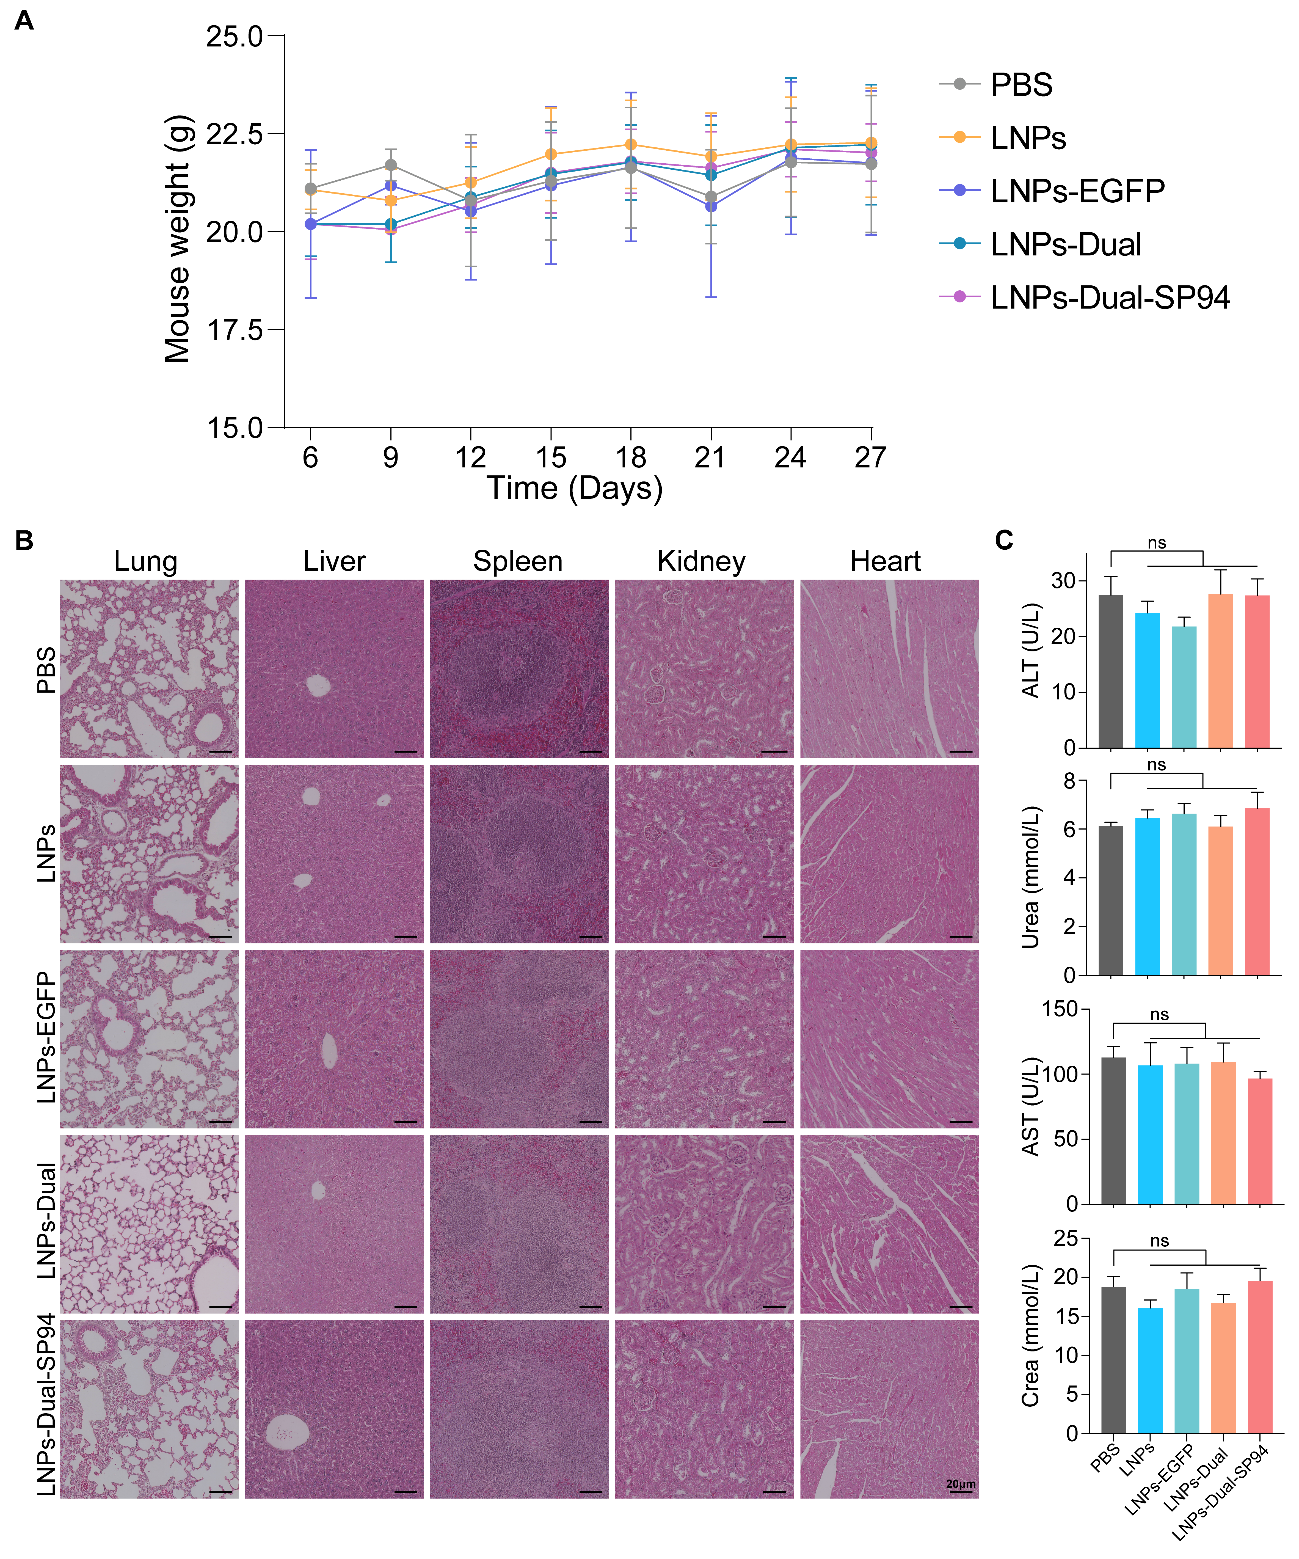


**Figure S6 | A** The body weight variation of HCCLM9 tumor-bearing mice during treatment. **B** Representative H&E-stained sections of the major organs from the tumor-bearing mice from different treatment groups. Scale bar: 20 µm. **C** Routine biochemical examination after different treatment groups. NS, no significance.
